# Supplementary material for: Effect of intensive care unit-specific virtual reality (ICU-VR) to improve psychological well-being in ICU survivors: study protocol for an international, multicentre, randomised controlled trial—the HORIZON-IC study
Source: PubMed Central journal article supplement — BMJ Open. 2022 Sep 20;12(9):e061876. doi: 10.1136/bmjopen-2022-061876 (PMC9490570; doi:10.1136/bmjopen-2022-061876), 2022-09-20
Supplement: bmjopen-2022-061876supp002.pdf [file bmjopen-2022-061876supp002.pdf]

## Supplementary File 1.

### *Translation of the video script of ICU-VR*

Supplement to:

Johan H. Vlake, Jasper van Bommel, Evert-Jan Wils, Tim I.M. Korevaar, Eva Klijn, Anna F.C. Schut, Jan H. Elderman, Joost A.M. Labout, Adrienne Raben, Annemieke Dijkstra, Stefanja Achterberg, Amber L. Jurriens, Margo M.M.C. van Mol, Diederik Gommers, Michel E. van Genderen.

**The effect of Intensive Care Unit-specific Virtual Reality (ICU-VR) to improve psychological well-being in ICU survivors: study protocol for a multicentre, randomised controlled trial - the HORIZON-IC study**

**Scene 1.** Introduction by an ICU physician and a nurse and tour around the ICU guided by a voice-over.

*Setting: The ICU physician and nurse are placed in front of the ICU.*

**ICU physician:** Hello, welcome to this virtual environment. My name is '**name physician**', one of the physicians in this ICU.

**ICU nurse:** Hello, I am '**name nurse**', one of the nurses in this ICU.

**ICU physician:** You were recently treated in the ICU. In this virtual environment, we provide you with explanations about the ICU and about the treatment you received here.

**ICU nurse:** Together, we will join you during this virtual reality experience. Therefore, we will first lay you down on an ICU bed, and then bring you to your ICU room.

*Setting: The patient will be virtually installed on an ICU bed during a fade in-fade out.*

**ICU nurse:** We will now bring you to your ICU room.

*Setting: The ICU physician and ICU nurse will bring the patient to one of the ICU rooms while walking over the intensive care department.*

**Voice-over:** Intensive care means intensive and special care for critically ill patients, where the most important vital functions, such as the respiratory rate, oxygen saturation and heart rate, can be monitored and supported, if needed. Therefore, this department is different from other departments. If you look around, you'll see the intensive care department. The intensive care department consists of several one-patient ICU rooms and a post for nurses located in the middle of the department. In an ICU room, circumstances and materials are available to offer critically ill patients the optimal treatment. Moreover, the chances of hospital acquired infections and medication failures are minimal, and a quiet environment is provided. At the nurse post, nurses are present throughout the day, as are monitors. As such, nurses can monitor you 24 hours per day. Nurses can also monitor patients physically through the windows of the room, which allows nurses to be able to continuously keep an eye on you.

*Setting: The patient arrives at the ICU room, and the ICU physician and ICU nurse place the patient on the bed in the ICU room.*

**ICU physician:** We are now entering an ICU room. Here, you'll receive an explanation about intensive care treatment. We will first explain the devices in the room, which are placed next to you. We will now leave the room and will come back after the explanation.

*Setting: The ICU physician and ICU nurse will leave the room.*

**Scene 2.** Explanation of all devices and noises in an ICU room.

**Voice-over:** There are several devices next to you, such as a monitor, medication pumps and a mechanical ventilator; look around you. To adequately monitor you, we want to know immediately when something is changing. For instance when your blood pressure is low, or when you're out of medication. Each device has its own functions and alarm noise to warn ICU nurses and physicians. As a result, you often hear alarm noises in your ICU room. Besides using monitors, you are monitored also in other manners. We will now explain the functions of each device to you.

*Setting: The surveillance monitor is outlined.*

**Voice-over:** When you look to your left, you'll see the surveillance monitor.

*Setting: A white arrow appears that points from the surveillance monitor to an explanation window in front of the patient, where the surveillance monitor is animated.*

**Voice-over:** When you look forward again, we will explain the function of the surveillance monitor. The surveillance monitor monitors heart rate, blood pressure, respiratory rate, and oxygen saturation. If, for instance, your blood pressure is too low, the following alarm signal is produced to warn the ICU nurse.  
<ALARM SIGNAL SURVEILLANCE MONITOR>

*Setting: The explanation window disappears. The medication pumps are outlined.*

**Voice-over:** If you look to your right, you'll see the medication pumps.

*Setting: A white arrow appears that points from the medication pumps to an explanation window in front of the patient, where the medication pumps are animated.*

**Voice-over:** These pumps are used to give medication. When you hear the following sound,  
<ALARM SIGNAL MEDICATION PUMPS>  
the nurse is warned that your medication is almost empty.

**Scene 3.** Explanation about mechanical ventilation, intubation, and tracheal tube suction.

*Setting: The explanation about the mechanical ventilator disappears, and an animation appears in the explanation window explaining intubation and mechanical ventilation.*

**Voice-over:** Because you were critically ill, we decided to support your breathing. This was done to maintain the appropriate amount of oxygen in your body. To support your breathing, we inserted a tracheal tube. This tube is placed through your mouth into your trachea. To make sure this procedure is carried out optimally and because this procedure is often uncomfortable, you were sedated during the insertion of the tube. At the end of the tube, there is a small air balloon, which is filled with air. This balloon prevents the leakage of oxygen and the contents of the stomach from entering the lungs. Due to the placement of the tube between the vocal cords, patients cannot talk when they are intubated. When the lungs have sufficiently recovered, the tracheal tube can be removed. The tracheal tube is frequently cleaned by suctioning the tube. The nurse will slide a suctioning tube in the tube. Hereby, mucus will be removed, and infections will be prevented. Sometimes, it will be enough to do this once, but this has to be repeated often.

*Setting: The explanation window disappears. The mechanical ventilator is outlined.*

**Voice-over:** If you look to your left, you'll see the mechanical ventilator.

**Voice-over:** When you look in front of you, we will give you a further explanation about the mechanical ventilator. The mechanical ventilator supports your breathing. If you heard the following sound,  
<ALARM SIGNAL MECHANICAL VENTILATOR>  
the nurse was warned.

*Setting: The animation of the mechanical ventilator disappears, and the explanation about prone positioning is animated in the explanation window.*

**Voice-over:** As a consequence of several diseases, including coronavirus, the alveoli and pulmonary vessels can partially close, resulting in the body being unable to absorb sufficient oxygen. There are relatively more alveoli in the back of the lungs. In the occasion mechanical ventilation in a normal position is no longer effective, it can be decided to ventilate patients in the prone position or laying on their stomach. The alveoli and pulmonary vessels in the back of the lungs are thereby better ventilated, hopefully resulting in better absorption of oxygen. Often, there is an immediate improvement in the mechanical ventilation conditions after prone positioning. To prevent pressure marks on the face, the eyes are protected and the head is placed in a position to the side. Over time, the positive effect of this prone position diminishes, and the patient is again placed on their back. Therefore, it is often decided to ventilate in prone positioning for several hours and thereafter again on the back for several hours. Because prone positioning can be uncomfortable, patients are sedated.

**Scene 4.** Explanation about central/peripheral lines, intravenous drips and the gastric tube,

*Setting: The explanation window disappears, and the ICU physician and nurse enter the room.*

**ICU physician:** The different devices, the mechanical ventilator and the alarm signals have just been explained to you. Now, you will receive an explanation concerning the drips, infusions and gastric tube.

*Setting: The ICU physician and nurse leave the room.*

**Voice-over:** IV drips and lines are necessary not only to administer medication and fluids but also to continuously monitor the blood pressure.

*Setting: The explanation window appears, and the function of a peripheral drip is explained using an animation.*

**Voice-over:** This is an 'ordinary' IV drip, also called a peripheral IV drip. This is usually inserted into a vessel in the forearm, but sometimes, it is placed in the foot. The nurse can administer medication or fluid through this drip. Because these peripheral vessels are thin, not every medication can be administered through the veins.

*Setting: Explanation of a central line is explained using an animation.*

**Voice-over:** Here, you see a central line. This is a thick IV drip that is inserted into a large blood vessel, often in the neck or groin. The insertion of such a line will be performed in a sterile manner; therefore, a blue cloth is stretched over your head. Working in a sterile field minimises the risk of infection. The main reason to insert a central line is to administer medications that cannot be administered through ordinary IV drips. Nutrition can also be directly administered to the blood stream through a central line.

*Setting: Explanation of an arterial line is explained using an animation.*

**Voice-over:** This is an arterial line. This is an IV drip that is placed directly into an artery, so blood pressure can continuously be monitored. It is also used to take blood samples. Without such a line, blood samples may have to be taken too often.

*Setting: Explanation about a gastric tube is given using an animation.*

**Voice-over:** A gastric tube is a tube that is placed through the nose or mouth through the oesophagus into the stomach. The tube is usually to administer tube feedings. It can also be used to administer medications.

*Setting: The tracheotomy procedure is explained using an animation.*

**Voice-over:** When patients are mechanically ventilated for a prolonged period of time, they sometimes receive a tracheotomy. During a tracheotomy procedure, a tube (also known as a cannula) is placed in the trachea through the neck. This cannula replaces the ventilation tube, which is inserted through the mouth. There are several reasons to perform a tracheotomy, but the most important one is long-term mechanical ventilation. The patient must be slowly and gradually weaned off mechanical ventilation. Tracheotomy placement is often conducted in the ICU. The cannula is inserted just above the sternum through an incision

5

Copyright © 2022. Erasmus MC, Rotterdam, the Netherlands. All rights reserved.

For use: contact [m.vangenderen@erasmusmc.nl](mailto:m.vangenderen@erasmusmc.nl).

in the trachea. The end of the tube can be inflated to prevent air leakage. Because the air flows through the cannula to the lungs and no air passes the vocal cords, patients initially cannot speak when they have a tracheotomy. However, the tracheal cannula can be closed using a speaking valve, whereby the end of the cannula is deflated; as a result, air will flow through the vocal cords making it possible to speak. The tracheostomy will be removed when a patient has sufficient strength to breath on their own and can cough up sputum properly.

**Scene 5.** Explanation about the treatment team and ICU workflow.

*Setting: The explanation window disappears, and an ICU physician, nurse and resident enter the ICU room.*

- Voice-over:** In the ICU, you are treated 24 hours per day by a treatment team. Therefore, there are many people working in the ICU.  
The medical treatment team that is primarily responsible for your treatment includes the ICU physician, the ICU resident and the ICU nurse.
- ICU physician:** My fellow ICU physicians and I, the intensivists, are specialised in the treatment of critically ill patients. Every morning, afternoon and evening, there is a meeting with the treatment team taking care of you to discuss how you are doing. This will take place in your room.
- Resident** Hello, my name is '**name resident**', and I am the resident, a doctor in training to become a medical specialist. My fellow residents and I are responsible for the daily medical care, in which we are always supervised by the intensivists.
- ICU nurse:** My fellow ICU nurses and I will look after you, monitor you continuously and are trained to operate the devices for your treatment. You will be taken care of by the same nurse every shift.

*Setting: The treatment team leaves the room.*

**Scene 6.** Explanation about isolation and personal protection measures.

**Voice-over:** During your stay in the ICU, you are treated in isolation. Isolation measures are aimed at preventing the spread of microorganisms, such as coronavirus. These measures are in addition to the basic hygiene measures. We will now show you how this was done.

*Setting: The treatment team returns to the room with isolation measures.*

**Voice-over:** The treatment team has applied isolation measures when entering the room by wearing personal protective equipment. Before entering the room, the team was therefore wearing: Non-sterile gloves, a mouth-nose mask, an isolation apron with long sleeves, safety glasses, a hair cap.  
Prior to leaving the room, the personal protective equipment is removed and hands are disinfected.



**Scene 7.** Outro

*Setting: The explanation window disappears and the ICU physician and nurse re-enter the room.*

**ICU physician:** We hope you now have a better understanding of the treatment you received in the ICU.  
This is the end of this video, you can remove the VR glasses.
